# Supplementary material for: Alginate/graphene double-network nanocomposite hydrogel beads with low-swelling, enhanced mechanical properties, and enhanced adsorption capacity
Source: Royal Society of Chemistry journal article supplement (doi:10.1039/c6ta02738e), 2016-01-01
Supplement: c6ta02738e1.pdf [file c6ta02738e1.pdf]

## Supporting Information

### **Alginate/graphene double-network nanocomposite hydrogel bead with low-swelling, enhanced mechanical property, and enhanced adsorption capacity**

*Yuan Zhuang<sup>a</sup>, Fei Yu<sup>c</sup>, Hong Chen<sup>d</sup>, Jie Zheng<sup>d</sup>, Jie Ma<sup>a, d\*</sup>, Junhong Chen<sup>a, b\*</sup>*

a State Key Laboratory of Pollution Control and Resource Reuse, School of Environmental Science and Engineering, Tongji University, 1239 Siping Road, Shanghai 200092, P. R. China. Tel: 86-21-6598 1831; E-mail: [jma@tongji.edu.cn](mailto:jma@tongji.edu.cn)

b Department of Mechanical Engineering, University of Wisconsin-Milwaukee, Milwaukee, WI 53211, USA. E-mail: [jhchen@uwm.edu](mailto:jhchen@uwm.edu)

c College of Chemistry and Environmental Engineering, Shanghai Institute of Technology, Shanghai 2001418, China

d Department of Chemical and Biomolecular Engineering, The University of Akron, Akron, Ohio, USA 44325.

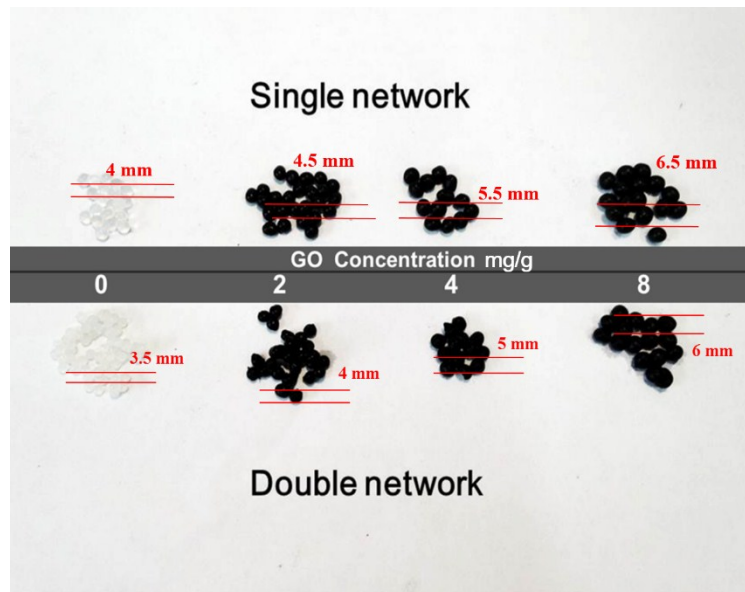

**Fig. S1 Optical images of hydrogels with different GO content.**

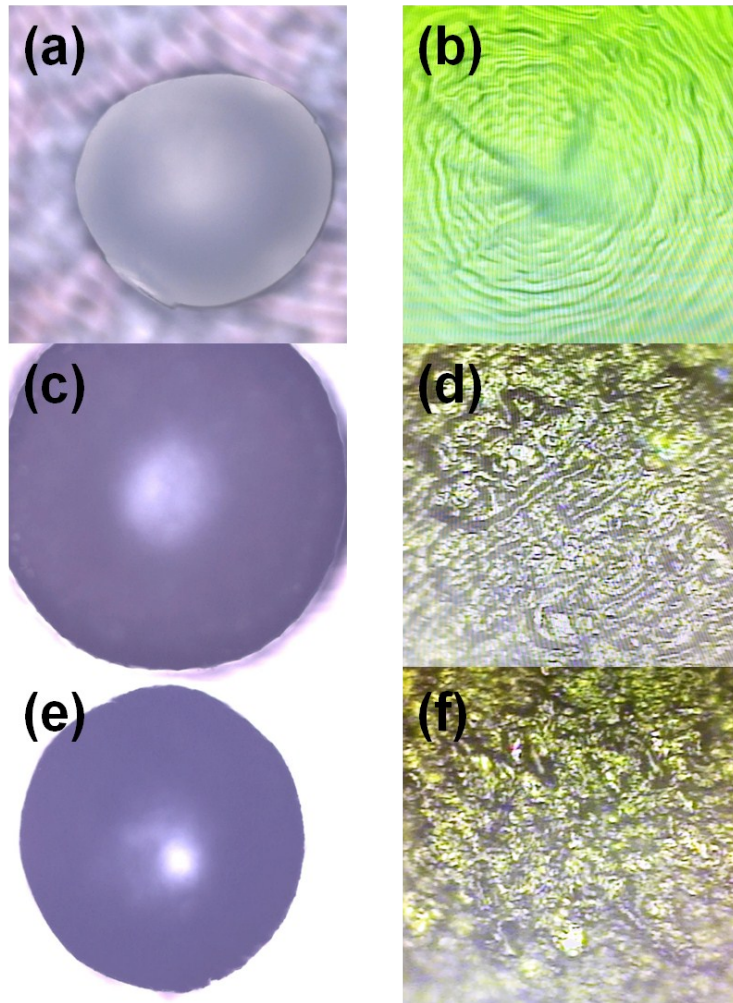

**Fig. S2 Optical images of (a) alginate gel $\times$ 5, (b) alginate gel $\times$ 20, (c) GAS $\times$ 5, (d) GAS $\times$ 20, (e) GAD $\times$ 5 and (f) GAD $\times$ 20.**

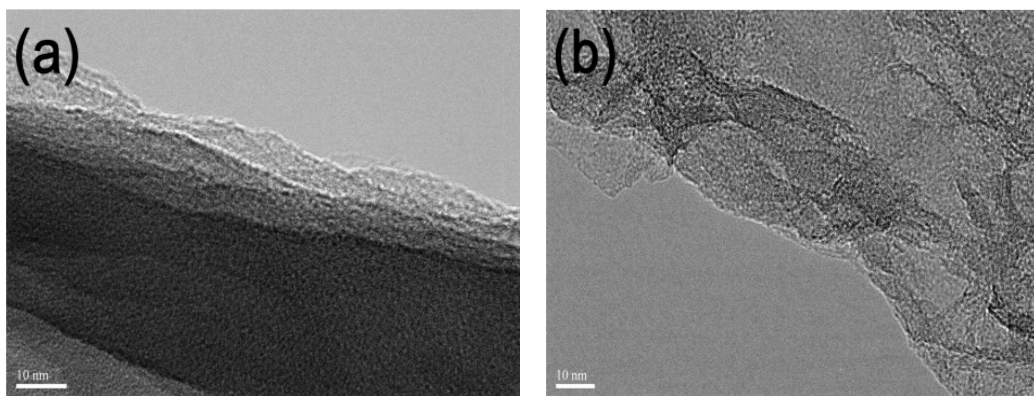

**Fig. S3 TEM images of (a) GAS and (b) GAD.**

The adsorption isotherm was fitted by Langmuir and Freundlich models as in equations (1) and (2).

$$\frac{C_e}{q_e} = \frac{1}{K_L} + \left(\frac{\alpha_L}{K_L}\right)C_e \quad (1)$$

$$\ln q_e = \ln K_F + \frac{1}{n} \ln C_e \quad (2)$$

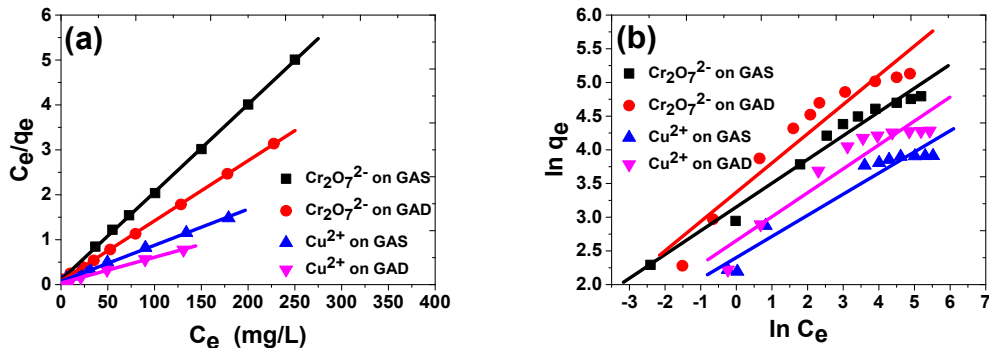

Fig. S4 Langmuir and Freundlich model for metal adsorption on GAS and GAD.

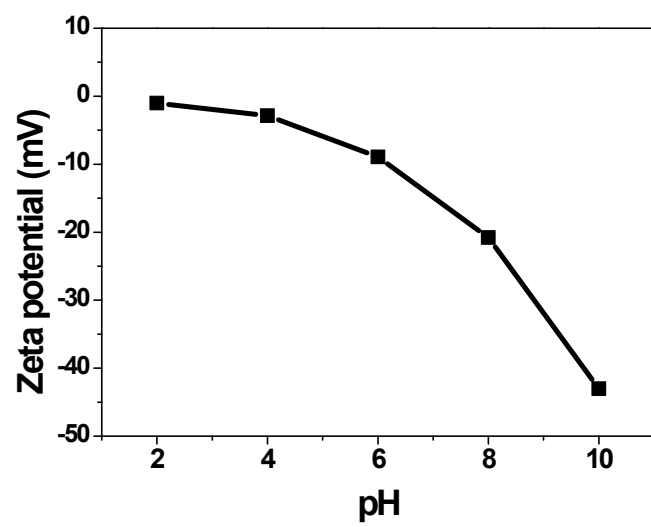

**Fig. S5 Zeta potential of GAD under different pH.**

**Table S1 Concentrations of Ca<sup>2+</sup> and Na<sup>+</sup> in GAS and GAD before and after being soaked in NaCl for 24h.**

| Mass ratio (%)   | Before             |                    | After                |                      |
|------------------|--------------------|--------------------|----------------------|----------------------|
|                  | GAS                | GAD                | GAS                  | GAD                  |
| Ca <sup>2+</sup> | 14.1               | 13.2               | 0.8                  | 2.5                  |
| Na <sup>+</sup>  | 2×10 <sup>-6</sup> | 2×10 <sup>-7</sup> | 1.4×10 <sup>-3</sup> | 1.2×10 <sup>-3</sup> |

**Table S2 Langmuir isotherm parameters of Cr<sub>2</sub>O<sub>7</sub><sup>2-</sup> and Cu<sup>2+</sup> adsorption on GAD.**

| Isotherm model | Parameters            | Cr <sub>2</sub> O <sub>7</sub> <sup>2-</sup> |       | Cu <sup>2+</sup> |       |
|----------------|-----------------------|----------------------------------------------|-------|------------------|-------|
|                |                       | GAS                                          | GAD   | GAS              | GAD   |
| Langmuir       | q <sub>m</sub> (mg/g) | 51.28                                        | 72.46 | 125.00           | 169.5 |
|                | K <sub>L</sub> (L/mg) | 9.47                                         | 12.34 | 13.83            | 29.58 |
|                | R <sup>2</sup>        | 0.999                                        | 0.999 | 0.996            | 0.999 |
| Freundlich     | K <sub>F</sub> (L/g)  | 11.70                                        | 14.15 | 23.33            | 29.08 |
|                | n                     | 3.34                                         | 2.81  | 2.83             | 2.30  |
|                | R <sup>2</sup>        | 0.917                                        | 0.893 | 0.973            | 0.917 |
